## Perioperative Cardiac Arrests in Children between 1988 and 2005 at a Tertiary Referral Center: A Study of 92,881 Patients: Erratum

In the article “Perioperative cardiac arrests in children between 1988 and 2005 at a tertiary referral center” (Flick RP, Sprung J, Harrison TE, Gleich SJ, Schroeder DR, Hanson AC, Buenvenida SL, Warner DO: *ANESTHESIOLOGY* 2007; 106:226–37) there is an error in the following sentence: “Of the 26 noncardiac patients who experienced CA, 7 had congenital heart disease, such that 87.5% of all patients who experienced perioperative CA had underlying heart disease.” This sentence should have read “76% of all patients,” not “87.5% of all patients.” The authors regret this error.

DOI: 10.1097/ALN.0000000000002763

### Reference

1. Flick RP, Sprung J, Harrison TE, Gleich SJ, Schroeder DR, Hanson AC, Buenvenida SL, Warner DO: Perioperative cardiac arrests in children between 1988 and 2005 at a tertiary referral center: A study of 92,881 patients. *ANESTHESIOLOGY*. 2007; 106:226–37

## Limb Remote Ischemic Preconditioning Attenuates Lung Injury after Pulmonary Resection under Propofol-Remifentanyl Anesthesia: A Randomized Controlled Study: Erratum

In the article “Limb Remote Ischemic Preconditioning Attenuates Lung Injury after Pulmonary Resection under Propofol-Remifentanyl Anesthesia: A Randomized Controlled Study” (Li C, Xu M, Wu Y, Li YS, Huang WQ, Liu KX: *ANESTHESIOLOGY* 2014; 121:249–59), the *P* values in tables 1 and 2 are systematically incorrect, given the descriptive statistics. The authors are unable to locate the primary data to recalculate the *P* values in these tables. They located the primary data for table 3 and verified that the descriptive data presented in the article are correct. The authors believe that the reported descriptive statistics, including tables 1 and 2, are correct, and that the reported *P* values are incorrect due to a systematic error. The authors regret these errors.

DOI: 10.1097/ALN.0000000000002765

### Reference

1. Li C, Xu M, Wu Y, Li YS, Huang WQ, Liu KX: Limb remote ischemic preconditioning attenuates lung injury after pulmonary resection under propofol-remifentanyl anesthesia: A randomized controlled study. *ANESTHESIOLOGY* 2014; 121:249–59

## Limb Remote Ischemic Preconditioning for Intestinal and Pulmonary Protection during Elective Open Infrarenal Abdominal Aortic Aneurysm Repair: A Randomized Controlled Trial: Erratum

In the article “Limb Remote Ischemic Preconditioning for Intestinal and Pulmonary Protection during Elective Open Infrarenal Abdominal Aortic Aneurysm Repair: A Randomized Controlled Trial” (Li C, Li YS, Xu M, Wen SH, Yao X, Wu Y, Huang CY, Huang WQ, Liu KX: *ANESTHESIOLOGY* 2013; 118:842–52), the *P* values in table 2 are systematically incorrect, given the descriptive statistics. The authors are unable to locate the primary data to recalculate the *P* values in these tables. The authors believe that the reported descriptive statistics, including tables 1 and 2, are correct, and that the reported *P* values are incorrect due to a systematic error. The authors regret these errors.

DOI: 10.1097/ALN.0000000000002766

### Reference

1. Li C, Li YS, Xu M, Wen SH, Yao X, Wu Y, Huang CY, Huang WQ, Liu KX: Limb remote ischemic preconditioning for intestinal and pulmonary protection during elective open infrarenal abdominal aortic aneurysm repair: A randomized controlled trial. *ANESTHESIOLOGY* 2013; 118:842–52

## Comparison of Tracheal Intubation Conditions in Operating Room and Intensive Care Unit: A Prospective, Observational Study: Erratum

In the article “Comparison of Tracheal Intubation Conditions in Operating Room and Intensive Care Unit: A Prospective, Observational Study” (Taboada M, Doldan P, Calvo A, Almeida X, Ferreira E, Baluja A, Cariñena A, Otero P, Caruezo V, Naveira A, Otero P, Alvarez J: *ANESTHESIOLOGY* 2018; 129:321–8), there was a mistake in table 2. The complication of hypoxia less than 80% was 29 patients (14%) in the intensive care unit, but table 2 mistakenly shows 19 patients (14%). The authors regret this error.

DOI: 10.1097/ALN.0000000000002807

### Reference

1. Taboada M, Doldan P, Calvo A, Almeida X, Ferreira E, Baluja A, Cariñena A, Otero P, Caruezo V, Naveira A, Otero P, Alvarez J: Comparison of tracheal intubation conditions in operating room and intensive care unit: A prospective, observational study. *ANESTHESIOLOGY* 2018; 129:321–8
